# Supplementary material for: Organosilicon functionalized glycerol carbonates as electrolytes for lithium-ion batteries
Source: Royal Society of Chemistry journal article supplement (doi:10.1039/c4ra15854g), 2015-01-01
Supplement: c4ra15854g1.pdf [file c4ra15854g1.pdf]

## Supporting Information

### **Organosilicon functionalized glycerol carbonates as electrolytes for lithium-ion batteries**

**Jinglun Wang,<sup>a</sup> Tianqiao Yong,<sup>a,b</sup> Jianwen Yang,<sup>c</sup> Chuying Ouyang<sup>d</sup> and Lingzhi Zhang\*<sup>a</sup>**

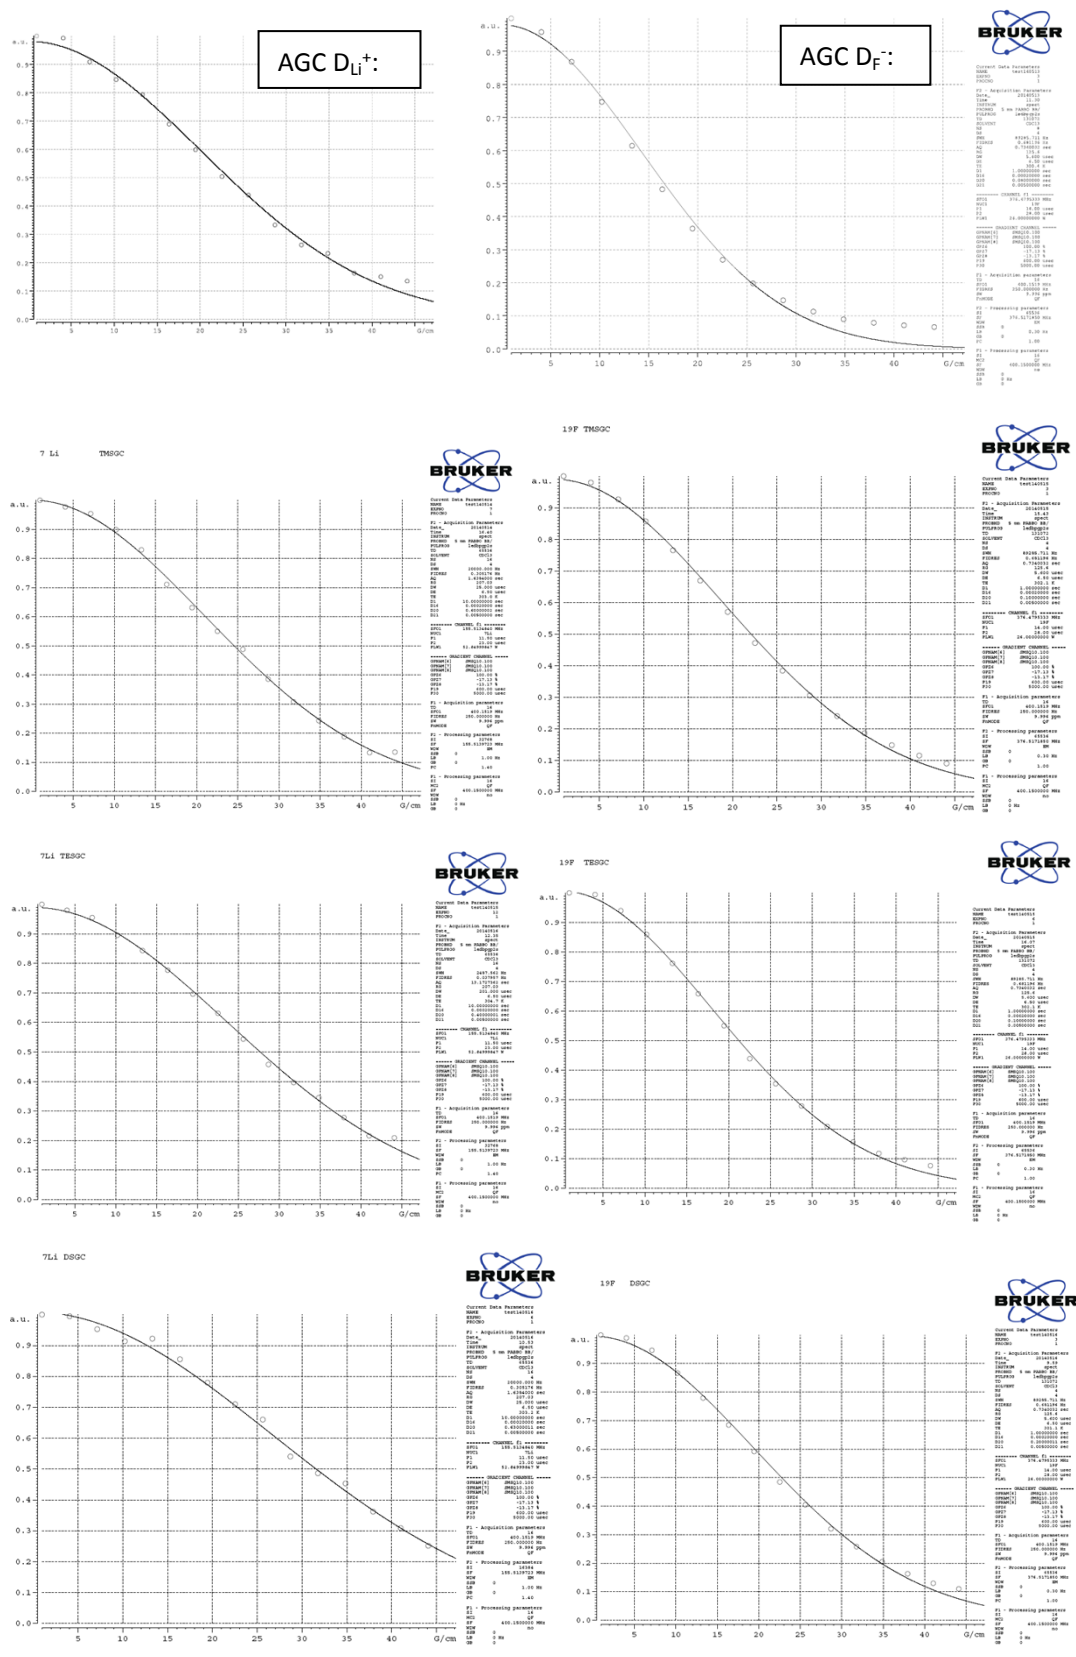

**Figure S1.** The PFG-NMR fitting curves for diffusion coefficient of the organosilicon functionalized glycerol carbonate.

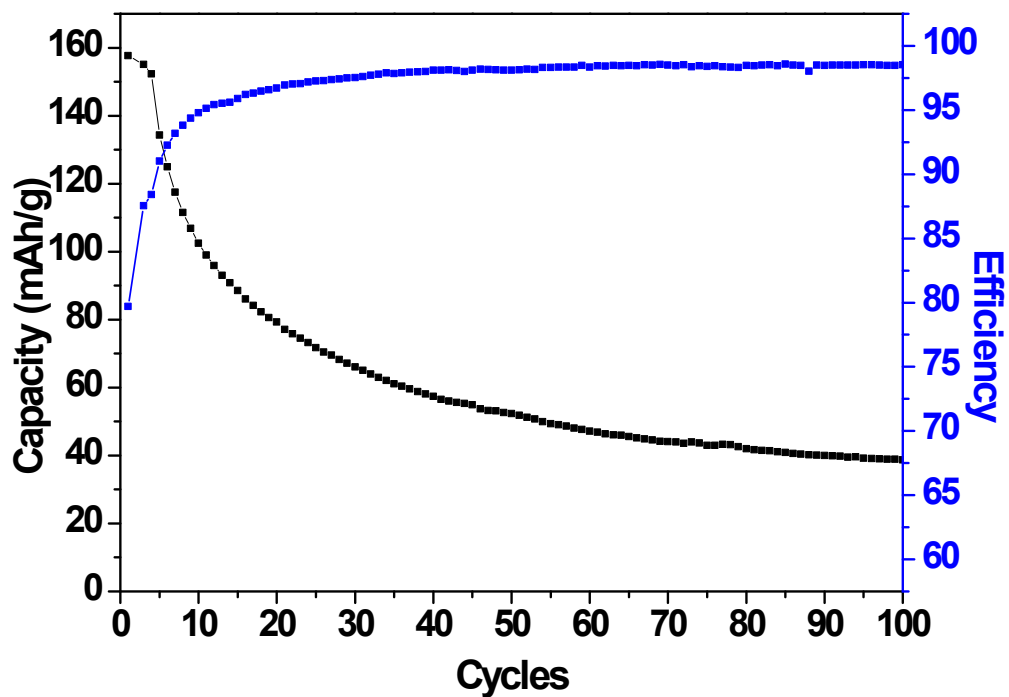

**Figure S2.** Cell performance of LiCoO<sub>2</sub>/graphite cell between 2.7-4.4 V at C/5 with 1 M LiPF<sub>6</sub> EC/DEC/DMC (1:1:1 by vol.) as electrolyte.
